# Supplementary material for: The Arctic picoeukaryote Micromonas pusilla benefits from Ocean Acidification under constant and dynamic light
Source: Copernicus journal article supplement (doi:10.5194/bg-2019-343), 2019-08-30
Supplement: Supplementary file 1 [file bg-2019-343-supplement.pdf]

## S1. Oxidative stress measurements

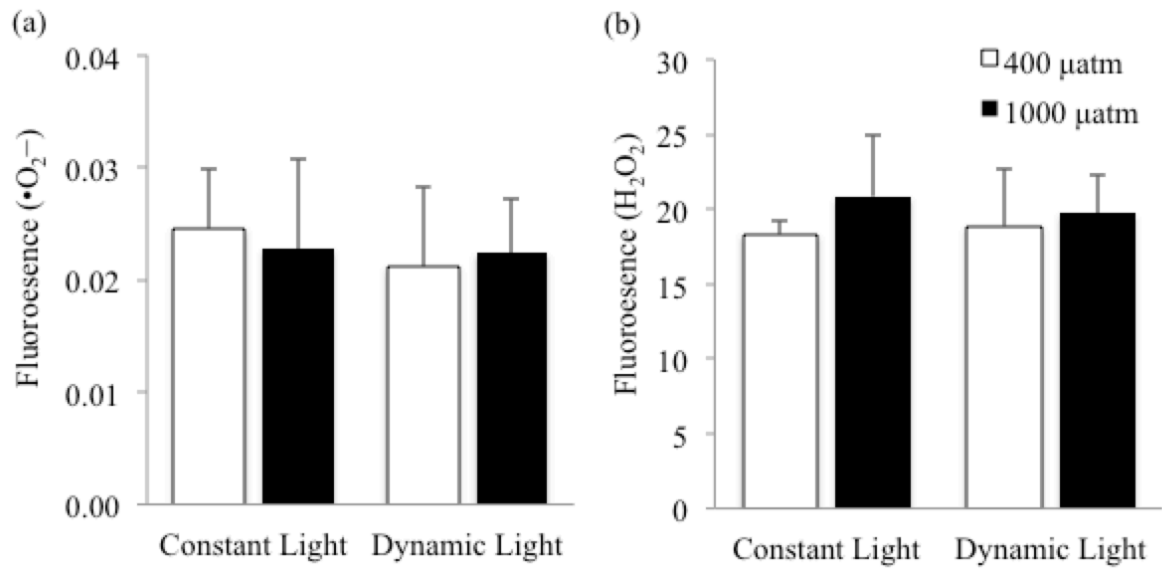

**Figure S1.** The relative production of (a) oxygen free radicals ( $\bullet\text{O}_2^-$ ) and (b) hydrogen peroxide ( $\text{H}_2\text{O}_2$ ) in *Micromonas pusilla* under constant light and dynamic light and  $p\text{CO}_2$  levels of 400  $\mu\text{atm}$  (white) and 1000  $\mu\text{atm}$  (black;  $n=4$ ; mean  $\pm$  one SD) at time point 2. The letters indicate significant differences between treatments ( $p<0.05$ ), represented as: (b)  $p\text{CO}_2$
